# Supplementary material for: Applications of Bone Morphogenetic Proteins in Dentistry: A Bibliometric Analysis
Source: Hindawi journal article supplement (doi:10.1155/2020/5971268), 2020-01-01
Supplement: f2 [file 5971268.f2.pdf]

Selected keywords search and total results from Web of Science 'All Databases'

1341 articles identified in the Dentistry, Oral Surgery, and Medicine journals

**Inclusion criteria**

Articles with the following keywords in the title and publication in journals belonging to Dentistry, Oral Surgery & Medicine category:

- "Bone morphogenetic protein" OR
- "Bone morphogenic protein" OR
  - "BMP" OR
  - "rhBMP

**Exclusion criteria**

- Articles published in journals other than the category of Dentistry, Oral Surgery, and Medicine

Articles not mentioning the following search terms in the title:

- "Bone morphogenetic protein" OR
- "Bone morphogenic protein" OR
  - "BMP" OR
  - "rhBMP

Articles included for bibliometric analysis  
n=50

Organization of the articles based on citation count (in descending order)
